# Supplementary material
Source: PubMed Central journal article supplement (PMC8142743)
Supplement: mmc1.pdf [file mmc1.pdf]

**Supplementary information to:**

**SARS-CoV-2 N gene dropout and N gene Ct value shift as indicator for the presence of**

**B.1.1.7 lineage in a commercial multiplex PCR assay**

Wollschlaeger P<sup>1\*</sup>, Todt D<sup>2,3\*</sup>, Gerlitz N<sup>1</sup>, Pfaender S<sup>2</sup>, Bollinger T<sup>4</sup>, Sing A<sup>5</sup>, Dangel A<sup>5</sup>, Ackermann N<sup>5</sup>, Korn K<sup>6</sup>,

Ensser A<sup>6</sup>, Steinmann E<sup>2</sup>, Buhl M<sup>1#</sup>, Steinmann J<sup>1#</sup>

|                          |     |     |     |     |
|--------------------------|-----|-----|-----|-----|
|                          | 1   |     |     | 12  |
|                          | M   | S   | D   | T   |
| patient 49 (non-B.1.1.7) | ATG | TCT | GAT | AAT |
| pCRII-TOPO_N-gene_D3     | ATG | TCT | GAT | AAT |
| patient 1 (B.1.1.7)      | ATG | TCT | CTA | AAT |
| pCRII-TOPO_N-gene_3L     | ATG | TCT | CTA | AAT |
|                          | M   | S   | L   | T   |

**Supplement figure 1:** Nucleotide sequence alignment (MUSCLE) of N gene sequences from two exemplary patient samples (non-B.1.1.7 and B.1.1.7, respectively) and pCRII-TOPO\_N-gene\_D3 and \_3L plasmids. Only the region containing the D3L mutation is shown (nucleotide position 1-12), with D3 highlighted in green (non-B.1.1.7) and 3L (B.1.1.7) highlighted in red. Translated amino acid sequences are shown above and below the nucleotide sequences. N gene sequences from the patient samples were extracted from whole-genome sequences.

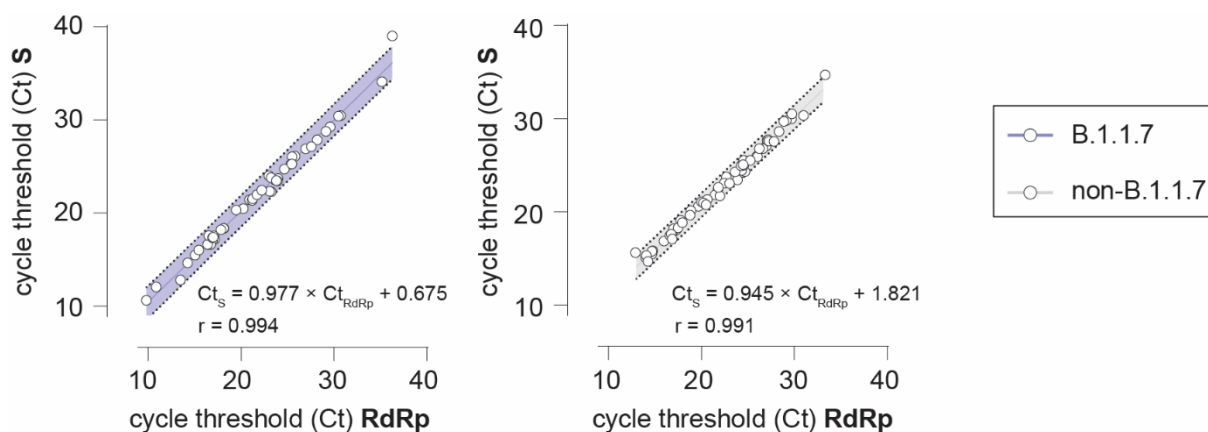

**Supplement figure 2:** Linear regression of Ct values of S gene and RdRp gene of B.1.1.7 (left panel, blue line and 99% prediction band) and non-B.1.1.7 (right panel, gray line and 99% prediction band) positive patient specimens.

**Supplement table 1:** Included samples (n = 48) with Ct value shifts of  $\Delta N/RdRp$  and  $\Delta N/S$  in the Allplex™ SARS-CoV-2/FluA/FluB/RSV assay with the corresponding results of whole genome sequencing or variant-specific PCR.

| Patient # | Allplex™ SARS-CoV-2/FluA/FluB/RSV |       |       | $\Delta N/RdRp$ | $\Delta N/S$ | Lineage / variant PCR* |
|-----------|-----------------------------------|-------|-------|-----------------|--------------|------------------------|
|           | S                                 | RdRp  | N     |                 |              |                        |
| 1         | 26.10                             | 25.80 | 32.80 | 7.00            | 6.70         | B.1.1.7                |
| 2         | 17.54                             | 17.09 | 24.31 | 7.22            | 6.77         | B.1.1.7                |
| 3         | 26.04                             | 25.48 | 33.16 | 7.68            | 7.12         | B.1.1.7                |
| 4         | 22.27                             | 23.26 | 31.47 | 8.21            | 9.20         | B.1.1.7                |
| 5         | 18.33                             | 18.13 | 25.44 | 7.31            | 7.11         | B.1.1.7                |
| 6         | 26.90                             | 26.96 | 37.23 | 10.27           | 10.33        | B.1.1.7                |
| 7         | 21.42                             | 20.91 | 27.75 | 6.84            | 6.33         | B.1.1.7                |
| 8         | 18.35                             | 18.10 | 24.55 | 6.45            | 6.20         | B.1.1.7                |
| 9         | 22.32                             | 23.07 | 30.69 | 7.62            | 8.37         | B.1.1.7                |
| 10        | 12.79                             | 13.47 | 21.56 | 8.09            | 8.77         | B.1.1.7                |
| 11        | 15.48                             | 15.05 | 24.39 | 9.34            | 8.91         | B.1.1.7                |
| 12        | 17.19                             | 17.15 | 24.85 | 7.70            | 7.66         | B.1.1.7                |
| 13        | 29.25                             | 29.59 | -     | -               | -            | N501Y+, Del. H69/V70+  |
| 14        | 27.83                             | 28.19 | 37.48 | 9.29            | 9.65         | B.1.1.7                |
| 15        | 17.03                             | 16.90 | 25.92 | 9.02            | 8.89         | B.1.1.7                |
| 16        | 25.23                             | 25.36 | 33.51 | 8.15            | 8.28         | B.1.1.7                |
| 17        | 21.35                             | 21.19 | 28.51 | 7.32            | 7.16         | N501Y+, Del. H69/V70+  |
| 18        | 27.14                             | 27.55 | 35.38 | 7.83            | 8.24         | N501Y+, Del. H69/V70+  |
| 19        | 23.53                             | 23.66 | 30.65 | 6.99            | 7.12         | B.1.1.7                |
| 20        | 14.63                             | 14.23 | 22.40 | 8.17            | 7.77         | B.1.1.7                |
| 21        | 20.46                             | 20.25 | 28.61 | 8.36            | 8.15         | B.1.1.7                |
| 22        | 10.63                             | 9.80  | 19.90 | 10.10           | 9.27         | B.1.1.7                |
| 23        | 24.71                             | 24.65 | 31.86 | 7.21            | 7.15         | B.1.1.7                |
| 24        | 28.75                             | 29.14 | -     | -               | -            | B.1.1.7                |
| 25        | 23.70                             | 23.97 | 31.78 | 7.81            | 8.08         | B.1.1.7                |
| 26        | 16.61                             | 16.71 | 24.28 | 7.57            | 7.67         | N501Y+, Del. H69/V70+  |
| 27        | 18.20                             | 17.83 | 25.86 | 8.03            | 7.66         | N501Y+, Del. H69/V70+  |
| 28        | 21.54                             | 21.23 | 29.46 | 8.23            | 7.92         | N501Y+, Del. H69/V70+  |
| 29        | 16.63                             | 16.39 | 25.55 | 9.16            | 8.92         | N501Y+, Del. H69/V70+  |
| 30        | 24.00                             | 23.00 | 28.88 | 5.88            | 4.88         | N501Y+, Del. H69/V70+  |
| 31        | 20.50                             | 20.32 | 27.67 | 7.35            | 7.17         | N501Y+, Del. H69/V70+  |
| 32        | 12.07                             | 10.85 | 19.89 | 9.04            | 7.82         | N501Y+, Del. H69/V70+  |
| 33        | 20.33                             | 19.46 | 28.30 | 8.84            | 7.97         | N501Y+, Del. H69/V70+  |
| 34        | 17.57                             | 16.50 | 25.29 | 8.79            | 7.72         | N501Y+, Del. H69/V70+  |
| 35        | 23.81                             | 23.23 | 31.61 | 8.38            | 7.80         | N501Y+, Del. H69/V70+  |
| 36        | 18.43                             | 18.04 | 26.31 | 8.27            | 7.88         | B.1.1.7                |
| 37        | 30.45                             | 30.70 | -     | -               | -            | N501Y+, Del. H69/V70+  |
| 38        | 30.40                             | 30.48 | -     | -               | -            | N501Y+, Del. H69/V70+  |
| 39        | 34.10                             | 35.15 | -     | -               | -            | N501Y+, Del. H69/V70+  |
| 40        | 16.02                             | 15.45 | 23.73 | 8.28            | 7.71         | B.1.1.7                |
| 41        | 21.97                             | 21.69 | 28.61 | 6.92            | 6.64         | B.1.1.7                |
| 42        | 17.35                             | 16.91 | 23.66 | 6.75            | 6.31         | B.1.1.7                |
| 43        | 23.42                             | 23.92 | 30.73 | 6.81            | 7.31         | B.1.1.7                |
| 44        | 23.49                             | 23.79 | 31.06 | 7.27            | 7.57         | B.1.1.7                |
| 45        | 39.01                             | 36.29 | -     | -               | -            | B.1.1.7                |
| 46        | 17.41                             | 16.98 | 25.59 | 8.61            | 8.18         | B.1.1.7                |
| 47        | 22.46                             | 22.23 | 28.52 | 6.29            | 6.06         | B.1.1.7                |
| 48        | 25.25                             | 25.47 | 32.25 | 6.78            | 7.00         | B.1.1.7                |

\* N501Y+, Del. H69/V70+ indicate presence of lineage B.1.1.7.

**Supplement table 2:** Included samples (n = 58) with no Ct value shifts of  $\Delta N/RdRp$  and  $\Delta N/S$  in the Allplex™ SARS-CoV-2/FluA/FluB/RSV assay with the corresponding results of whole genome sequencing or variant-specific PCR.

| Patient # | Allplex™ SARS-CoV-2/FluA/FluB/RSV |       |       | $\Delta N/RdRp$ | $\Delta N/S$ | Lineage / variant PCR |
|-----------|-----------------------------------|-------|-------|-----------------|--------------|-----------------------|
|           | S                                 | RdRp  | N     |                 |              |                       |
| 49        | 15.81                             | 14.76 | 13.62 | 1.14            | 2.19         | B.1.1.317             |
| 50        | 16.85                             | 15.97 | 14.79 | 1.18            | 2.06         | B.1.1.317             |
| 51        | 30.01                             | 29.72 | 27.62 | 2.10            | 2.39         | N501Y+, E484K+        |
| 52        | 18.04                             | 17.28 | 16.94 | 0.34            | 1.10         | N501Y-, Del. H69/V70- |
| 53        | 24.24                             | 24.37 | 23.87 | 0.50            | 0.37         | N501Y-, Del. H69/V70- |
| 54        | 24.32                             | 24.68 | 23.87 | 0.81            | 0.45         | N501Y-, Del. H69/V70- |
| 55        | 15.46                             | 14.67 | 14.47 | 0.20            | 0.99         | N501Y-, Del. H69/V70- |
| 56        | 15.77                             | 14.67 | 14.33 | 0.34            | 1.44         | N501Y-, Del. H69/V70- |
| 57        | 17.83                             | 16.91 | 15.00 | 1.91            | 2.83         | N501Y-, Del. H69/V70- |
| 58        | 24.45                             | 24.34 | 22.52 | 1.82            | 1.93         | N501Y-, Del. H69/V70- |
| 59        | 17.44                             | 16.59 | 15.95 | 0.64            | 1.49         | N501Y-, Del. H69/V70- |
| 60        | 25.98                             | 25.97 | 25.22 | 0.75            | 0.76         | N501Y-, Del. H69/V70- |
| 61        | 29.81                             | 29.14 | 27.36 | 1.78            | 2.45         | N501Y-, Del. H69/V70- |
| 62        | 27.07                             | 26.99 | 25.94 | 1.05            | 1.13         | N501Y-, Del. H69/V70- |
| 63        | 28.62                             | 28.35 | 26.22 | 2.13            | 2.40         | N501Y-, Del. H69/V70- |
| 64        | 18.17                             | 16.99 | 16.11 | 0.88            | 2.06         | N501Y-, Del. H69/V70- |
| 65        | 20.57                             | 19.65 | 18.50 | 1.15            | 2.07         | N501Y-, Del. H69/V70- |
| 66        | 15.61                             | 12.88 | 12.27 | 0.61            | 3.34         | N501Y-, Del. H69/V70- |
| 67        | 22.45                             | 21.80 | 21.14 | 0.66            | 1.31         | N501Y-, Del. H69/V70- |
| 68        | 23.74                             | 22.68 | 21.35 | 1.33            | 2.39         | N501Y-, Del. H69/V70- |
| 69        | 21.06                             | 20.01 | 18.79 | 1.22            | 2.27         | N501Y-, Del. H69/V70- |
| 70        | 27.68                             | 27.07 | 26.11 | 0.96            | 1.57         | N501Y-, Del. H69/V70- |
| 71        | 20.12                             | 18.87 | 17.69 | 1.18            | 2.43         | N501Y-, Del. H69/V70- |
| 72        | 15.09                             | 13.98 | 13.52 | 0.46            | 1.57         | N501Y-, Del. H69/V70- |
| 73        | 25.91                             | 26.03 | 23.74 | 2.29            | 2.17         | N501Y-, Del. H69/V70- |
| 74        | 19.64                             | 18.76 | 18.10 | 0.66            | 1.54         | N501Y-, Del. H69/V70- |
| 75        | 18.28                             | 17.49 | 16.77 | 0.72            | 1.51         | N501Y-, Del. H69/V70- |
| 76        | 17.59                             | 16.73 | 16.09 | 0.64            | 1.50         | N501Y-, Del. H69/V70- |
| 77        | 19.08                             | 17.77 | 16.12 | 1.65            | 2.96         | N501Y-, Del. H69/V70- |
| 78        | 23.09                             | 22.45 | 21.24 | 1.21            | 1.85         | N501Y-, Del. H69/V70- |
| 79        | 18.83                             | 17.95 | 16.56 | 1.39            | 2.27         | N501Y-, Del. H69/V70- |
| 80        | 27.74                             | 27.18 | 26.60 | 0.58            | 1.14         | N501Y-, Del. H69/V70- |
| 81        | 15.29                             | 14.08 | 13.34 | 0.74            | 1.95         | N501Y-, Del. H69/V70- |
| 82        | 14.68                             | 14.24 | 12.99 | 1.25            | 1.69         | N501Y-, Del. H69/V70- |
| 83        | 26.78                             | 26.60 | 25.85 | 0.75            | 0.93         | N501Y-, Del. H69/V70- |
| 84        | 17.07                             | 16.86 | 16.25 | 0.61            | 0.82         | N501Y-, Del. H69/V70- |
| 85        | 25.51                             | 24.55 | 23.89 | 0.66            | 1.62         | N501Y-, Del. H69/V70- |
| 86        | 25.01                             | 24.58 | 23.20 | 1.38            | 1.81         | N501Y-, Del. H69/V70- |
| 87        | 23.42                             | 23.88 | 22.09 | 1.79            | 1.33         | N501Y-, Del. H69/V70- |
| 88        | 26.78                             | 26.24 | 25.44 | 0.80            | 1.34         | N501Y-, Del. H69/V70- |
| 89        | 27.59                             | 27.28 | 26.16 | 1.12            | 1.43         | N501Y-, Del. H69/V70- |
| 90        | 16.85                             | 15.97 | 14.76 | 1.21            | 2.09         | N501Y-, Del. H69/V70- |
| 91        | 34.70                             | 33.32 | 31.63 | 1.69            | 3.07         | N501Y-, Del. H69/V70- |
| 92        | 21.83                             | 21.48 | 19.50 | 1.98            | 2.33         | N501Y-, Del. H69/V70- |
| 93        | 24.28                             | 23.63 | 22.82 | 0.81            | 1.46         | N501Y-, Del. H69/V70- |
| 94        | 21.34                             | 20.65 | 19.76 | 0.89            | 1.58         | N501Y-, Del. H69/V70- |
| 95        | 23.06                             | 23.01 | 21.90 | 1.11            | 1.16         | N501Y-, Del. H69/V70- |
| 96        | 27.57                             | 27.82 | 26.53 | 1.29            | 1.04         | N501Y-, Del. H69/V70- |
| 97        | 21.71                             | 21.98 | 20.94 | 1.04            | 0.77         | N501Y-, Del. H69/V70- |
| 98        | 29.71                             | 28.87 | 27.83 | 1.04            | 1.88         | N501Y-, Del. H69/V70- |
| 99        | 20.96                             | 20.20 | 19.30 | 0.90            | 1.66         | N501Y-, Del. H69/V70- |
| 100       | 24.94                             | 24.25 | 23.36 | 0.89            | 1.58         | N501Y-, Del. H69/V70- |

**Supplement table 2 continued:**

|     |       |       |       |      |      |                       |
|-----|-------|-------|-------|------|------|-----------------------|
| 101 | 30.33 | 30.99 | 28.11 | 2.88 | 2.22 | N501Y-, Del. H69/V70- |
| 102 | 30.52 | 29.73 | 28.49 | 1.24 | 2.03 | N501Y-, Del. H69/V70- |
| 103 | 25.52 | 25.26 | 24.44 | 0.82 | 1.08 | N501Y-, Del. H69/V70- |
| 104 | 22.63 | 21.81 | 19.75 | 2.06 | 2.88 | N501Y-, Del. H69/V70- |
| 105 | 25.07 | 24.48 | 23.45 | 1.03 | 1.62 | N501Y-, E484K+        |
| 106 | 20.74 | 20.49 | 20.39 | 0.1  | 0.35 | B.1.351               |

**Supplement table 3:** The Allplex™ SARS-CoV-2/FluA/FluB/RSV Assay discriminates SARS-CoV-2 N-gene 3L from D3 plasmids, while the Allplex™ 2019-nCoV Assay does not.

| Copy numbers       | Allplex™ SARS-CoV-2/FluA/FluB/RSV |           |       | Allplex™ 2019-nCoV |           |       |
|--------------------|-----------------------------------|-----------|-------|--------------------|-----------|-------|
|                    | N gene D3                         | N gene L3 | ΔCt N | N gene D3          | N gene L3 | ΔCt N |
| $1.25 \times 10^8$ | 13.99                             | 24.34     | 10.1  | 17.54              | 18.61     | 1.07  |
| $1.25 \times 10^7$ | 19.15                             | 28.72     | 9.1   | 22.53              | 22.74     | 0.21  |
| $1.25 \times 10^6$ | 23.68                             | 31.79     | 8.1   | 26.27              | 26.14     | 0.13  |
| $1.25 \times 10^5$ | 28.75                             | 36.74     | 7.1   | 30.03              | 29.87     | 0.19  |
